# Supplementary material for: Photoelectrochemical performance of nanoscale Cu2O by integrating ZnO thin films mimicking a 3D–2D heterojunction: experiments & first-principles analysis
Source: Royal Society of Chemistry journal article supplement (doi:10.1039/d4nj03600j), 2024-01-01
Supplement: d4nj03600j1.pdf [file d4nj03600j1.pdf]

## Photoelectrochemical performance of nanoscale $\text{Cu}_2\text{O}$ by integrating $\text{ZnO}$ thin films mimicking as 3D-2D heterojunction: Experiments & First-Principles analysis

Ajay<sup>1</sup>, Chinmay Kumar Shukla<sup>2</sup>, Shubham Kumar<sup>1</sup>, Pravin Popinand Ingole<sup>1</sup>, Sameer Sapra<sup>1</sup>, Sumant Upadhyay<sup>2\*</sup>

<sup>1</sup> Department of Chemistry, Indian Institute of Technology, New Delhi, India

<sup>2</sup> Amity Institute of Nanotechnology, Amity University, Noida, Uttar Pradesh, India

*\*Email of the corresponding author: supadhyay2@amity.edu*

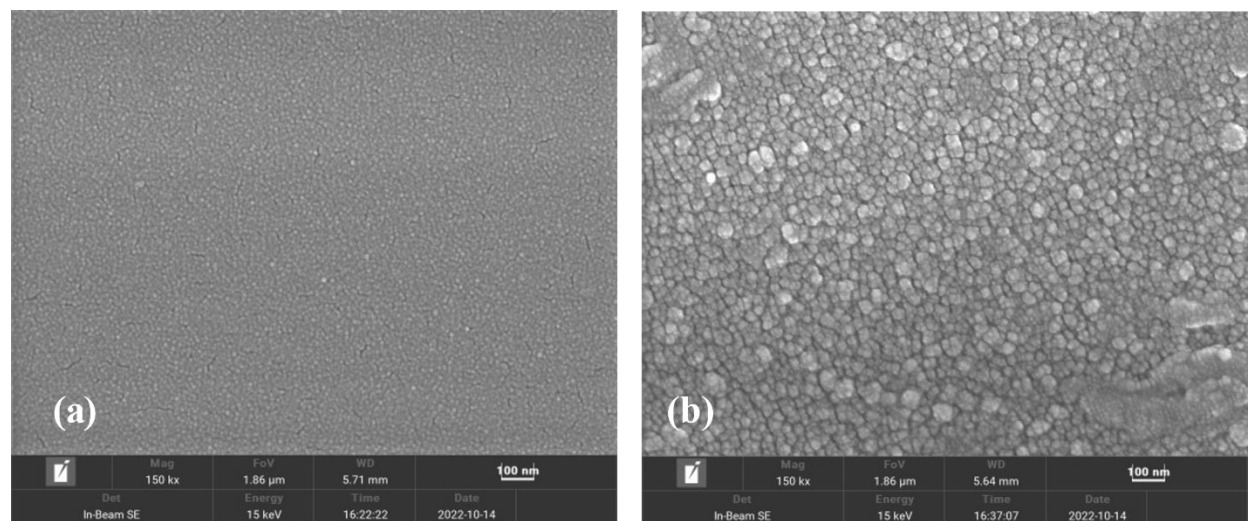

Figure S1 FE- SEM micrographs of (a)  $\text{ZnO}$ ; (b)  $\text{Cu}_2\text{O}$ .

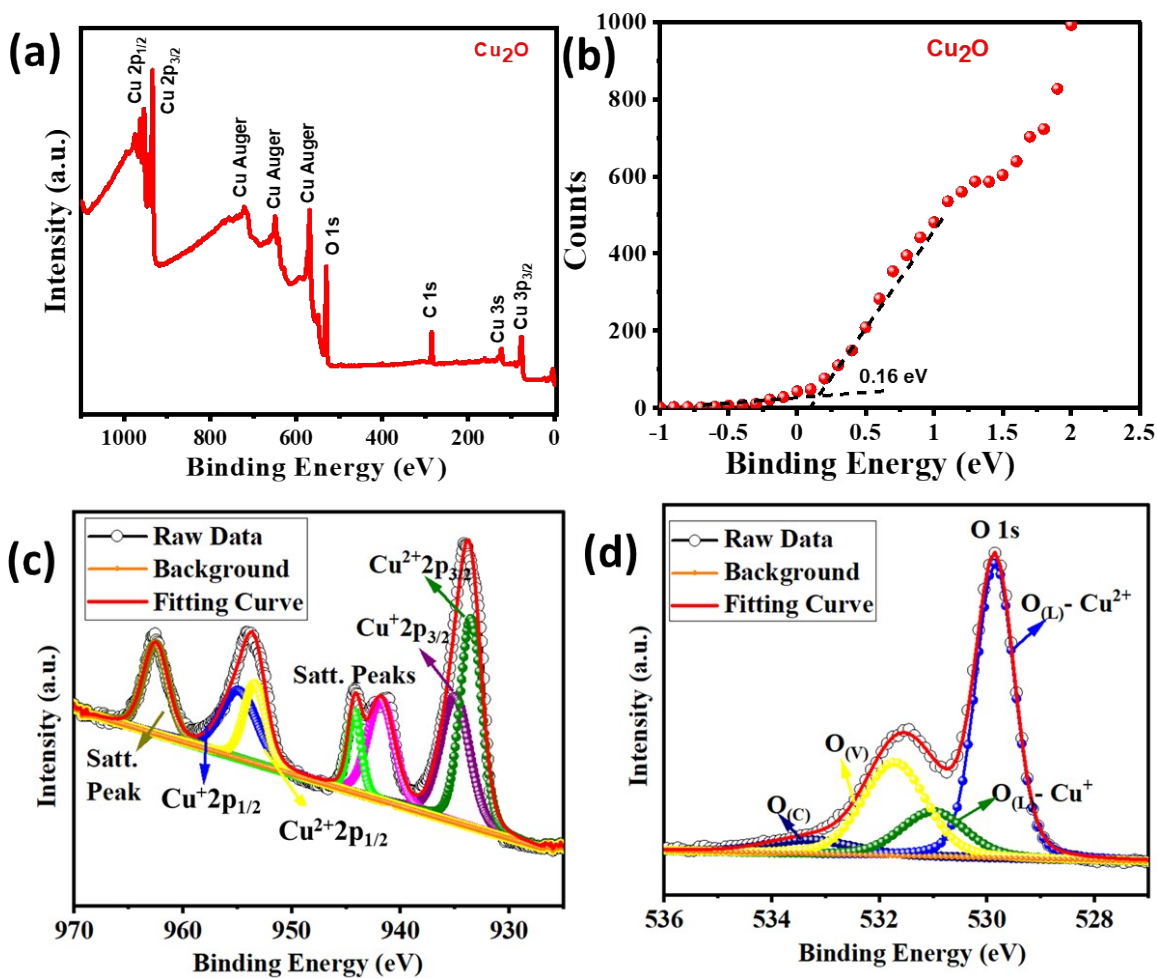

Figure S2  $\text{Cu}_2\text{O}$  XPS (a) Survey Spectrum; (b) Valence band spectra; elemental analysis (c)  $\text{Cu } 2p$ ; (d)  $\text{O } 1s$ .

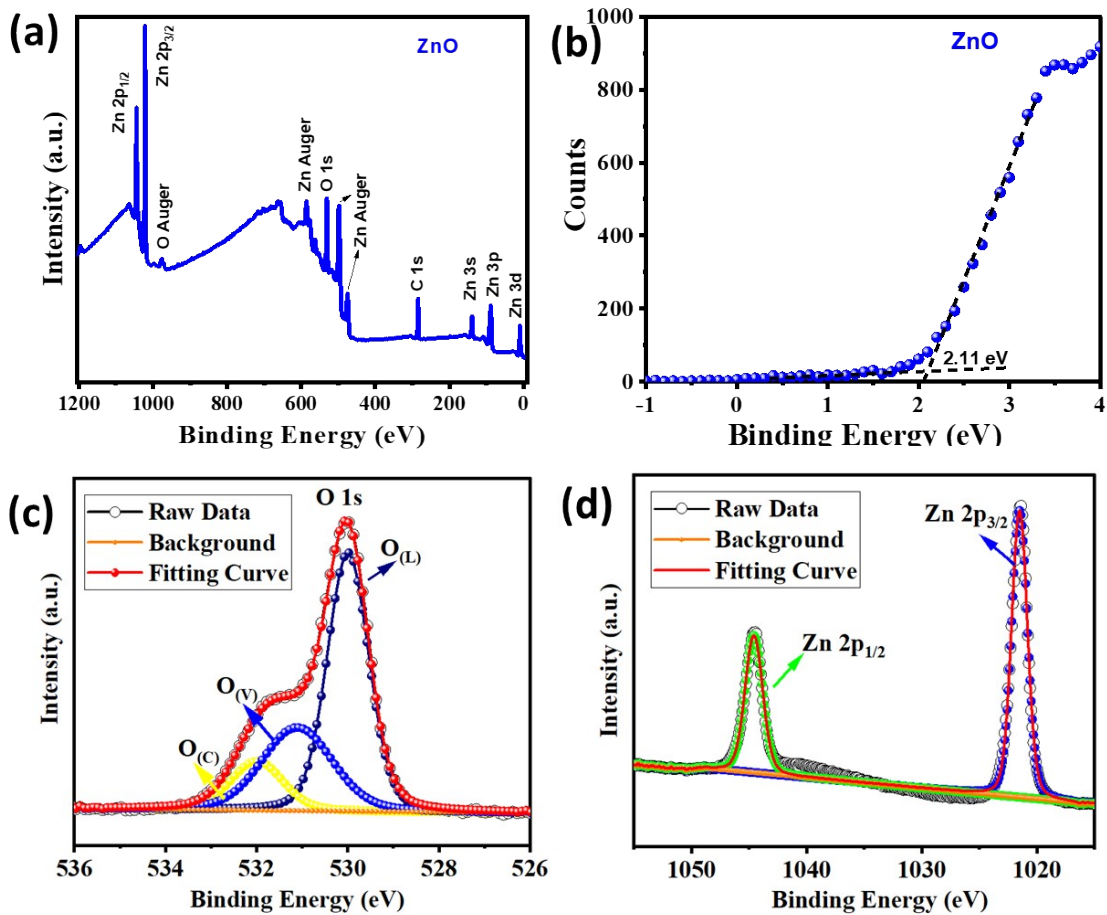

Figure S3 ZnO XPS (a) Survey Spectrum; (b) Valence band spectra; elemental analysis (c) Zn 2p; (d) O 1s.

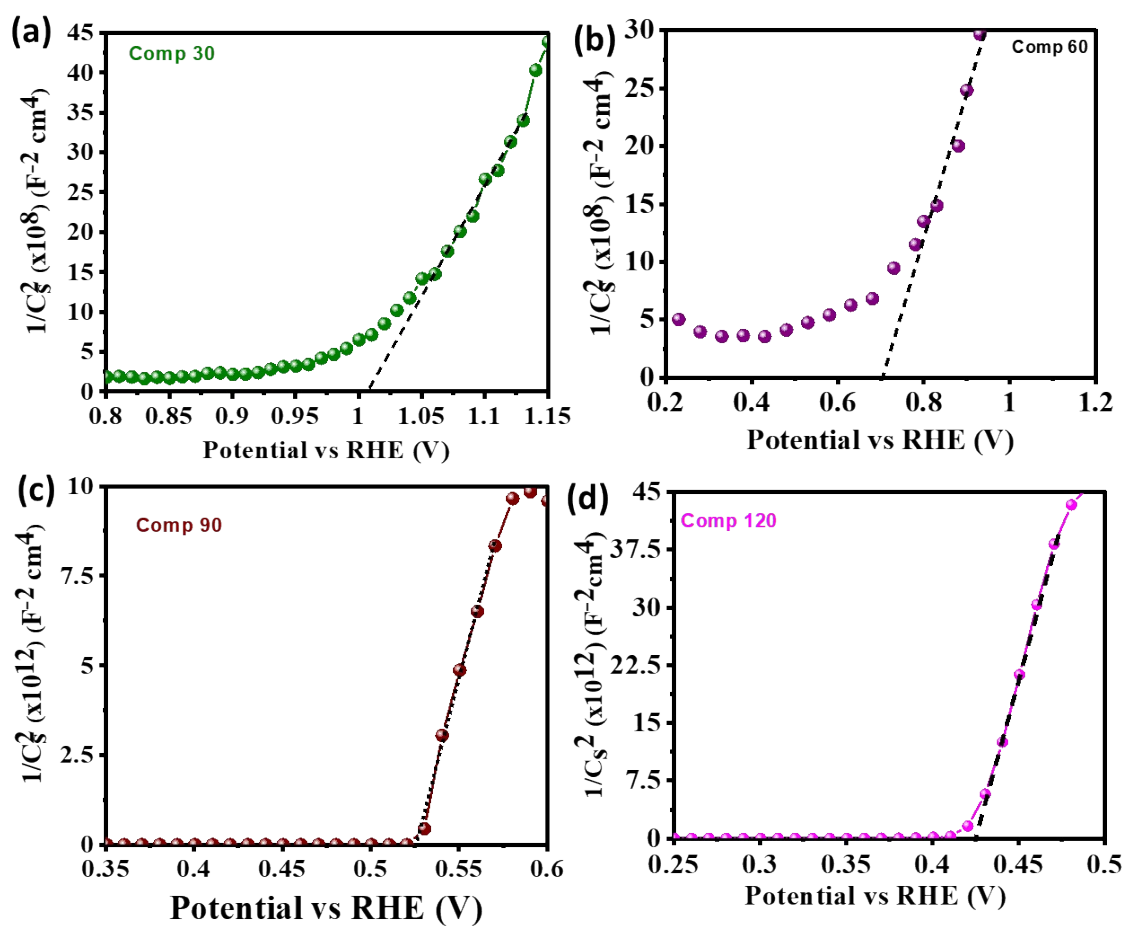

Figure S4 Mott-Schottky plots of (a) comp 30 (b) comp 60, (c) comp 90 and (d) comp 120.

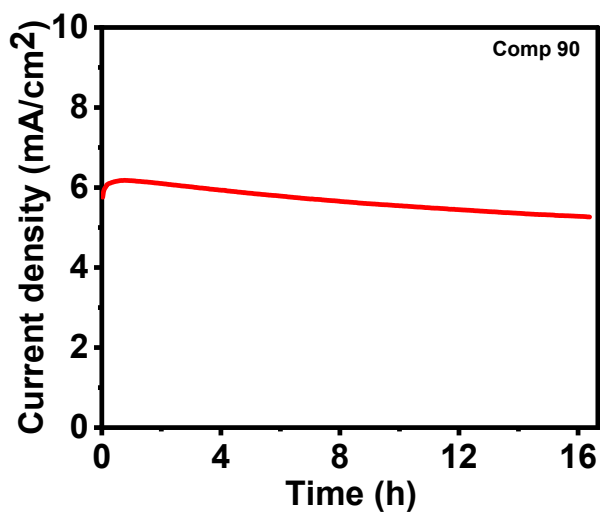

Figure S5 Chronoamperometry at 1.8 V vs. RHE under continuous light illumination of comp 90.

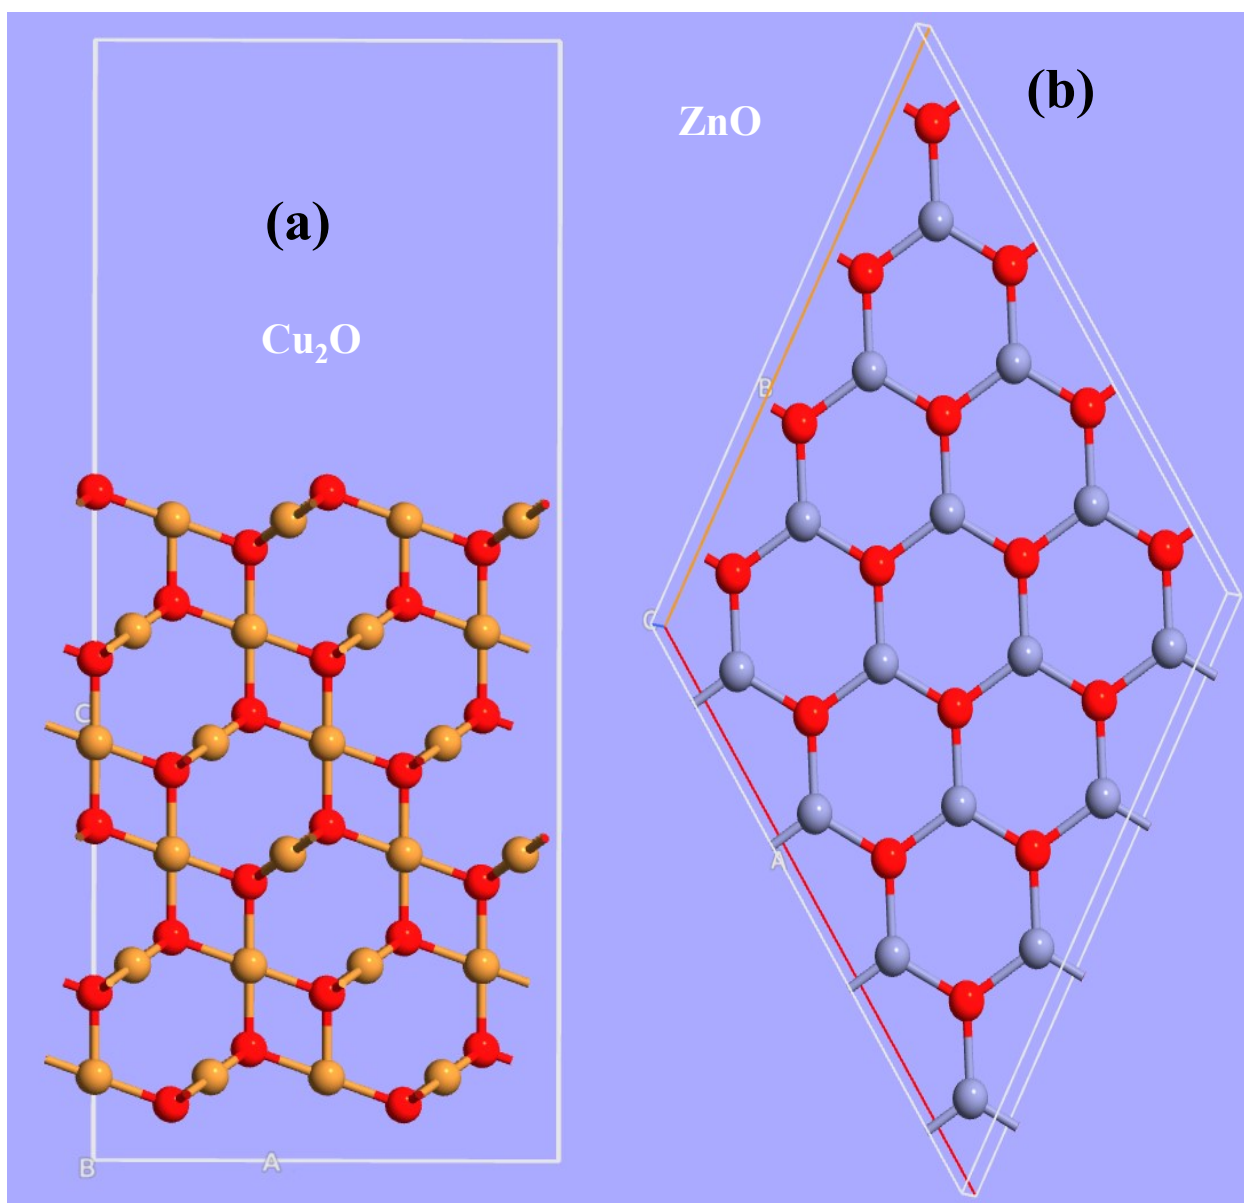

Figure S6 Relaxed (a)  $\text{Cu}_2\text{O}$  {111} surface; (b) ZnO nanosheet.

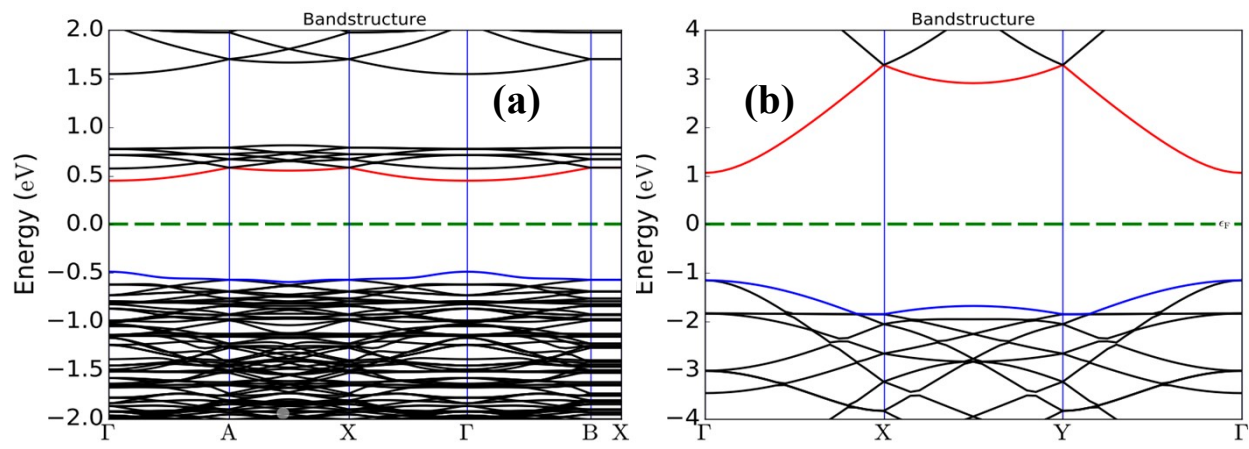

Figure S7 Simulated Bandstructure (a)  $\text{Cu}_2\text{O}$ ; (b)  $\text{ZnO}$ .
